# Supplementary material for: Ethnic Differences in Associations Between Fat Deposition and Incident Diabetes and Underlying Mechanisms: The SABRE Study
Source: PubMed Central journal article supplement (PMC4463764; doi:10.1002/oby.20997), 2015-02-03
Supplement: oby0023-0699-sd1.pdf [file oby0023-0699-sd1.pdf]

## Supporting information

### **Ethnic differences in associations between fat deposition and incident diabetes, and underlying mechanisms: the SABRE study.**

Sophie V Eastwood, Therese Tillin, Hakim-Moulay Dehbi, Andrew Wright, Nita G Forouhi, Ian Godsland, Peter Whincup, Naveed Sattar, Alun D Hughes, Nishi Chaturvedi

**Corresponding author:** Dr Sophie V Eastwood, UCL Institute of Cardiovascular Sciences, UCL, Gower Street, London, United Kingdom, WC1E 6BT. Email:

[sophie.eastwood@ucl.ac.uk](mailto:sophie.eastwood@ucl.ac.uk), Tel: +44 (0)207 679 9434.

## Supporting information

### a) VAT in cm<sup>2</sup>

| Gender/ ethnic group    | Prediction equation                                                                                                                                                                   | Adjusted R <sup>2</sup> |
|-------------------------|---------------------------------------------------------------------------------------------------------------------------------------------------------------------------------------|-------------------------|
| White European men      | $67.88 + (1.87 \times \text{age}) + (2.80 \times \text{weight}) - (1.79 \times \text{height}) + (7.57 \times \text{waist}) - (4.91 \times \text{hip}) - (2.85 \times \text{thigh})$   | 0.69                    |
| South Asian men         | $39.24 + (1.18 \times \text{age}) + (2.16 \times \text{weight}) - (2.35 \times \text{height}) + (6.56 \times \text{waist}) - (2.15 \times \text{hip}) - (1.81 \times \text{thigh})$   | 0.61                    |
| African Caribbean men   | $-422.31 + (0.94 \times \text{age}) + (8.63 \times \text{waist}) - (3.86 \times \text{hip}) + (1.47 \times \text{thigh})$                                                             | 0.73                    |
| White European women    | $-250.86 + (0.90 \times \text{age}) + (2.71 \times \text{weight}) + (2.62 \times \text{waist}) - (1.75 \times \text{thigh})$                                                          | 0.62                    |
| South Asian women       | $475.69 + (1.13 \times \text{age}) + (6.28 \times \text{weight}) - (2.47 \times \text{height}) + (1.85 \times \text{waist}) - (3.71 \times \text{hips}) - (4.35 \times \text{thigh})$ | 0.55                    |
| African Caribbean women | $323.39 + (2.20 \times \text{age}) + (3.20 \times \text{weight}) - (2.42 \times \text{height}) + (3.35 \times \text{waist}) - (4.93 \times \text{hip})$                               | 0.56                    |

### b) SAT in cm<sup>2</sup>

| Gender/ ethnic group    | Prediction equation                                                                                                                                     | Adjusted R <sup>2</sup> |
|-------------------------|---------------------------------------------------------------------------------------------------------------------------------------------------------|-------------------------|
| White European men      | $-28.95 - (1.19 \times \text{age}) + (2.29 \times \text{weight}) - (2.00 \times \text{height}) + (2.34 \times \text{waist}) + (2.49 \times \text{hip})$ | 0.72                    |
| South Asian men         | $48.58 + (0.63 \times \text{age}) + (3.88 \times \text{weight}) - (3.21 \times \text{height}) + (1.43 \times \text{waist}) + (2.54 \times \text{hip})$  | 0.75                    |
| African Caribbean men   | $-373.61 - (0.08 \times \text{age}) - (2.09 \times \text{height}) + (3.83 \times \text{waist}) + (6.52 \times \text{hip}) - (1.23 \times \text{thigh})$ | 0.81                    |
| White European women    | $24.98 - (0.99 \times \text{age}) + (3.76 \times \text{weight}) - (3.07 \times \text{height}) + (7.01 \times \text{hip}) - (3.03 \times \text{thigh})$  | 0.80                    |
| South Asian women       | $404.25 - (1.72 \times \text{age}) + (3.94 \times \text{weight}) - (5.21 \times \text{height}) + (5.63 \times \text{hip})$                              | 0.81                    |
| African Caribbean women | $-896.27 + (0.23 \times \text{age}) + (2.24 \times \text{waist}) + (9.48 \times \text{hip})$                                                            | 0.86                    |

**Table S1. Prediction equations for a) VAT and b) SAT, by sex and ethnicity: SABRE study (7).** Models used the following predictors for both depots: age (years), weight (kg), height (cm), waist circumference (cm), hip circumference (cm), thigh circumference (cm).

## Supporting information

| Variable                       | Participants with available follow-up data | Participants without available follow-up data | p      |
|--------------------------------|--------------------------------------------|-----------------------------------------------|--------|
| Age, years                     | 52.2±7.0                                   | 52.6±6.8                                      | 0.06   |
| Non-European ethnicity, %      | 51                                         | 53                                            | 0.13   |
| Estimated VAT, cm <sup>2</sup> | 133±76                                     | 133±76                                        | 0.98   |
| Estimated SAT, cm <sup>2</sup> | 213±84                                     | 281±85                                        | 0.07   |
| Truncal skinfolds, mm          | 45±18                                      | 45±18                                         | 0.30   |
| Leg skinfolds, mm              | 29±17                                      | 31±19                                         | <0.001 |
| Ever smoked, %                 | 47                                         | 46                                            | 0.63   |
| Physical activity (MJ/wk)      | 10(6-14)                                   | 10(5-14)                                      | 0.27   |
| Systolic BP, mmHg              | 124±18                                     | 125±17                                        | 0.06   |
| HDL, mmol/l                    | 1.30(1.08-1.57)                            | 1.32(1.08-1.61)                               | 0.05   |
| Fasting glucose, mmol/l        | 6.02±2.18                                  | 5.90±1.92                                     | 0.28   |
| Post-load glucose, mmol/l      | 6.07±2.98                                  | 5.95±2.64                                     | 0.15   |
| Fasting insulin, pmol/l        | 8.40(5.31-12.50)                           | 8.00(5.30-12.49)                              | 0.19   |
| Post-load insulin, pmol/l      | 27.80(16.40-49.30)                         | 26.96(15.80-47.10)                            | 0.14   |
| HbA <sub>1c</sub> , %          | 5.7(5.4-6.0)                               | 5.7(5.4-6.0)                                  | 0.33   |
| HOMA2-IR                       | 1.0(0.6-1.5)                               | 0.9(0.6-1.4)                                  | 0.13   |
| Matsuda index                  | 0.15(0.09-0.25)                            | 0.14(0.09-0.24)                               | 0.11   |

**Table S2. Comparison of baseline characteristics for individuals with and without follow-up data for diabetes: SABRE study.** Data are mean±SD or median (IQR) unless otherwise indicated, VAT= visceral adipose tissue, SAT= subcutaneous adipose tissue, truncal skinfolds= subscapular skinfold + suprailiac skinfold, leg skinfolds= thigh skinfold + suprapatellar skinfold.

## Supporting information

| <b>European men</b>            |              |              |            |            |
|--------------------------------|--------------|--------------|------------|------------|
|                                | <b>VAT</b>   | <b>SAT</b>   | <b>TSF</b> | <b>LSF</b> |
| <b>VAT</b>                     | 1            |              |            |            |
| <b>SAT</b>                     | 0.83*        | 1            |            |            |
| <b>TSF</b>                     | 0.61*        | 0.74*        | 1          |            |
| <b>LSF</b>                     | 0.34*        | 0.53*        | 0.62*      | 1          |
| <b>South Asian men</b>         |              |              |            |            |
|                                | <b>VAT</b>   | <b>SAT</b>   | <b>TSF</b> | <b>LSF</b> |
| <b>VAT</b>                     | 1            |              |            |            |
| <b>SAT</b>                     | <b>0.91*</b> | 1            |            |            |
| <b>TSF</b>                     | 0.56*        | <b>0.65*</b> | 1          |            |
| <b>LSF</b>                     | 0.44*        | 0.55*        | 0.65*      | 1          |
| <b>African Caribbean men</b>   |              |              |            |            |
|                                | <b>VAT</b>   | <b>SAT</b>   | <b>TSF</b> | <b>LSF</b> |
| <b>VAT</b>                     | 1            |              |            |            |
| <b>SAT</b>                     | <b>0.91*</b> | 1            |            |            |
| <b>TSF</b>                     | <b>0.75*</b> | 0.77*        | 1          |            |
| <b>LSF</b>                     | <b>0.51*</b> | 0.55*        | 0.64*      | 1          |
| <b>European women</b>          |              |              |            |            |
|                                | <b>VAT</b>   | <b>SAT</b>   | <b>TSF</b> | <b>LSF</b> |
| <b>VAT</b>                     | 1            |              |            |            |
| <b>SAT</b>                     | 0.88*        | 1            |            |            |
| <b>TSF</b>                     | 0.74*        | 0.72*        | 1          |            |
| <b>LSF</b>                     | 0.48*        | 0.57*        | 0.69*      | 1          |
| <b>South Asian women</b>       |              |              |            |            |
|                                | <b>VAT</b>   | <b>SAT</b>   | <b>TSF</b> | <b>LSF</b> |
| <b>VAT</b>                     | 1            |              |            |            |
| <b>SAT</b>                     | <b>0.51*</b> | 1            |            |            |
| <b>TSF</b>                     | <b>0.55*</b> | 0.66*        | 1          |            |
| <b>LSF</b>                     | 0.31*        | 0.71*        | 0.55*      | 1          |
| <b>African Caribbean women</b> |              |              |            |            |
|                                | <b>VAT</b>   | <b>SAT</b>   | <b>TSF</b> | <b>LSF</b> |
| <b>VAT</b>                     | 1            |              |            |            |
| <b>SAT</b>                     | <b>0.51*</b> | 1            |            |            |
| <b>TSF</b>                     | 0.64*        | 0.74*        | 1          |            |
| <b>LSF</b>                     | <b>0.17</b>  | 0.71*        | 0.60*      | 1          |

**Table S3. Correlations between adiposity measures, by sex and ethnicity: SABRE study.**

Data are Pearson's correlation coefficients, \*p<0.001. Coefficients shown in bold font were significantly different to those seen in Europeans (P<0.005). VAT= visceral adipose tissue, SAT= subcutaneous adipose tissue, TSF=truncal skinfolds= subscapular skinfold + suprailiac skinfold, LSF=leg skinfolds= thigh skinfold + suprapatellar skinfold.

## Supporting information

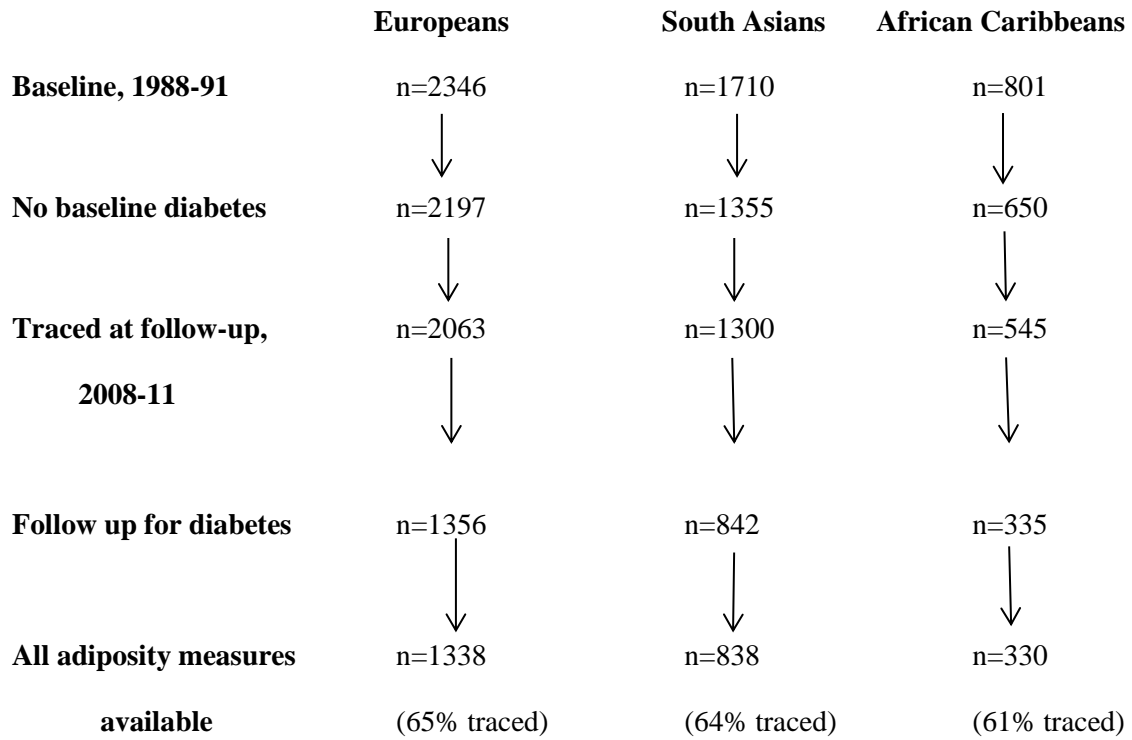

**Figure S1. Follow-up of the SABRE cohort, 1988-2011.**

## Supporting information

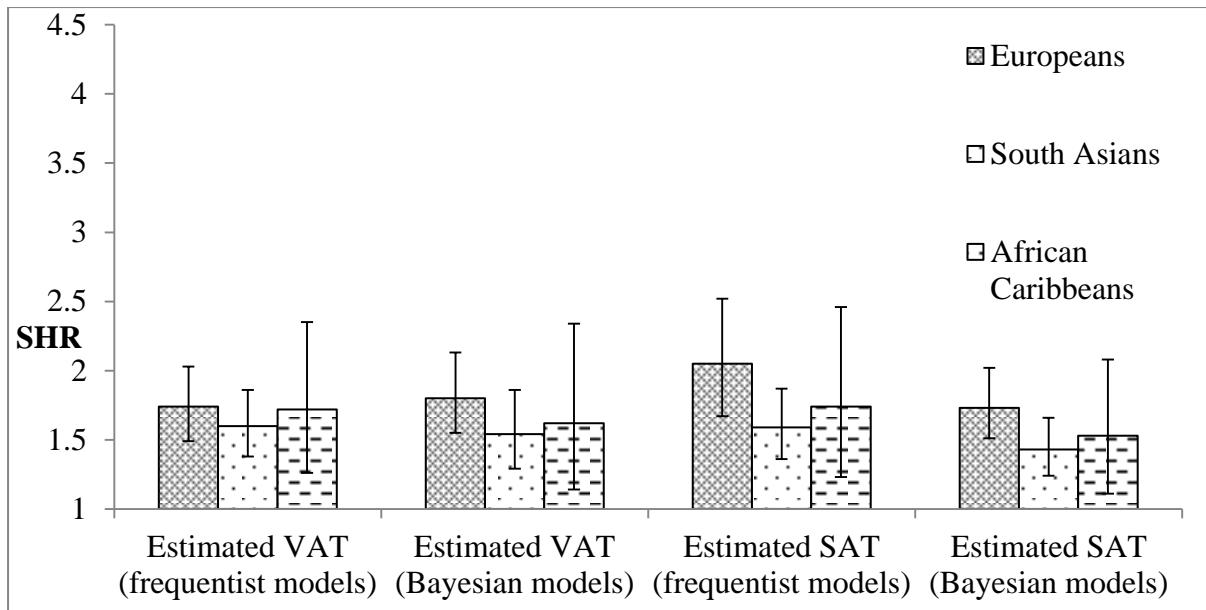

**Figure S2. Age-adjusted univariate associations between estimated VAT or SAT and diabetes in men: a comparison of estimates with and without allowances for uncertainty in the coefficients of the prediction equations used to derive baseline estimated VAT or SAT.** SHR=sub-hazard ratio (competing risks models) showing the effect of a 1 SD increase in each adiposity measure on incident diabetes, lines indicate 95% confidence intervals (frequentist models) or 95% credible intervals (Bayesian models). Bayesian models incorporate uncertainty in the beta-coefficients of the prediction equations used to derive baseline adiposity measures, whereas frequentist models do not. VAT= visceral adipose tissue, SAT= subcutaneous adipose tissue.

## Supporting information

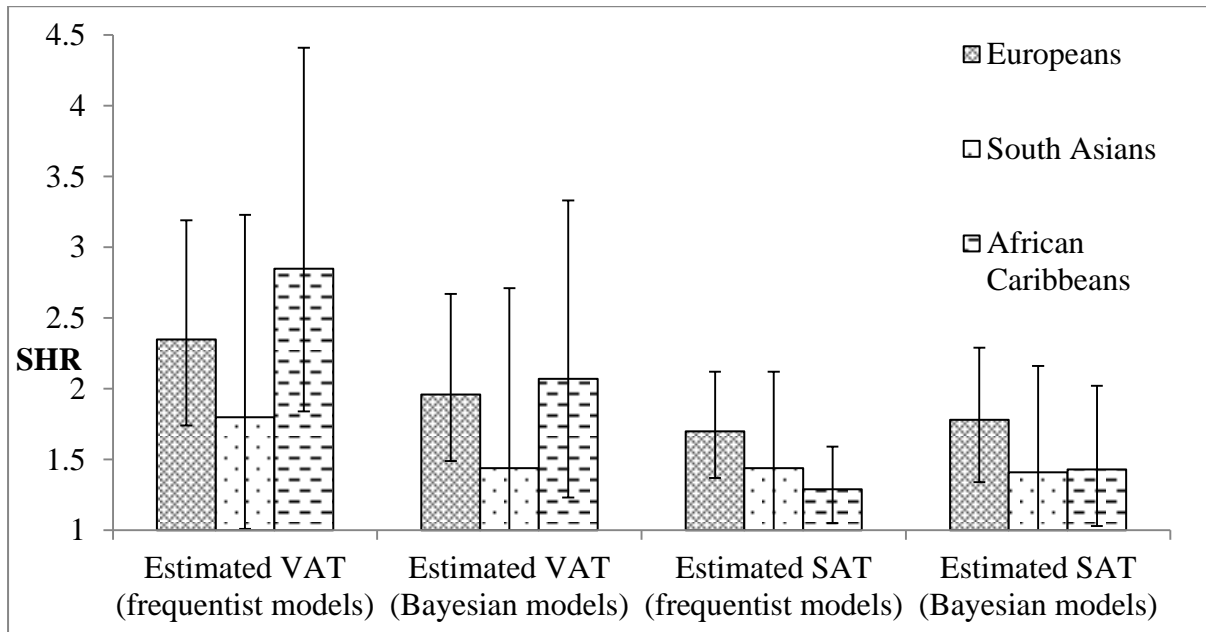

**Figure S3. Age-adjusted univariate associations between estimated VAT or SAT and diabetes in women: a comparison of estimates with and without allowances for uncertainty in the coefficients of the prediction equations used to derive baseline estimated VAT or SAT.** SHR=sub-hazard ratio (competing risks models) showing the effect of a 1 SD increase in each adiposity measure on incident diabetes, lines indicate 95% confidence intervals (frequentist models) or 95% credible intervals (Bayesian models). Bayesian models incorporate uncertainty in the beta-coefficients of the prediction equations used to derive baseline adiposity measures, whereas frequentist models do not. VAT= visceral adipose tissue, SAT= subcutaneous adipose tissue.
